# Supplementary material for: Evaluating effective factors on the activity and loading of immobilized α-amylase onto magnetic nanoparticles using a response surface-desirability approach
Source: Royal Society of Chemistry journal article supplement (doi:10.1039/c5ra26140f), 2016-01-01
Supplement: c5ra26140f1.pdf [file c5ra26140f1.pdf]

**Supplementary information:**

Table 1-S ANOVA of CCD model for activity of immobilized  $\alpha$ -amylase

| Source                      | Degree of Freedom | Mean Square | F-value  | P-value  | Remarks         |
|-----------------------------|-------------------|-------------|----------|----------|-----------------|
| <b>Model</b>                | 15                | 174.1775    | 29.0598  | < 0.0001 | significant     |
| <b>A-C<sub>enz</sub></b>    | 1                 | 739.4818    | 123.3754 | < 0.0001 |                 |
| <b>B-CGA</b>                | 1                 | 127.4114    | 21.2573  | < 0.0001 |                 |
| <b>C-Time</b>               | 1                 | 770.9863    | 128.6317 | < 0.0001 |                 |
| <b>D-pH</b>                 | 1                 | 6.2881      | 1.0491   | 0.3095   |                 |
| <b>E-C<sub>buffer</sub></b> | 1                 | 0.7048      | 0.1176   | 0.7327   |                 |
| <b>AB</b>                   | 1                 | 270.0579    | 45.0565  | < 0.0001 |                 |
| <b>AC</b>                   | 1                 | 86.8459     | 14.4894  | 0.0003   |                 |
| <b>AE</b>                   | 1                 | 37.0912     | 6.1883   | 0.0154   |                 |
| <b>BC</b>                   | 1                 | 187.4553    | 31.2751  | < 0.0001 |                 |
| <b>BD</b>                   | 1                 | 5.6609      | 0.9444   | 0.3347   |                 |
| <b>BE</b>                   | 1                 | 64.2150     | 10.7136  | 0.0017   |                 |
| <b>DE</b>                   | 1                 | 27.6727     | 4.6169   | 0.0353   |                 |
| <b>A<sup>2</sup></b>        | 1                 | 244.4831    | 36.4051  | < 0.0001 |                 |
| <b>Residual</b>             | 65                | 6.7156      |          |          |                 |
| <b>Lack of Fit</b>          | 26                | 8.8742      | 1.6818   | 0.0692   | not significant |
| <b>Pure Error</b>           | 39                | 5.2765      |          |          |                 |

Table 2-S ANOVA of CCD model for amount of immobilized  $\alpha$ -amylase

| Source                      | Degree of Freedom | Mean Square | F Value     | P-value  | Remarks         |
|-----------------------------|-------------------|-------------|-------------|----------|-----------------|
| <b>Model</b>                | 35                | 109010.0878 | 545.9173    | < 0.0001 | significant     |
| <b>A-Cenz</b>               | 1                 | 96951.7835  | 485.5299    | < 0.0001 |                 |
| <b>B-CGA</b>                | 1                 | 2.9131      | 0.0145      | 0.9044   |                 |
| <b>C-Time</b>               | 1                 | 1779.3697   | 8.9109      | 0.0045   |                 |
| <b>D-pH</b>                 | 1                 | 1181.9522   | 5.9191      | 0.0189   |                 |
| <b>E-C<sub>buffer</sub></b> | 1                 | 120.3886    | 0.6029      | 0.4414   |                 |
| <b>AB</b>                   | 1                 | 3412.4260   | 17.0892     | 0.0001   |                 |
| <b>AC</b>                   | 1                 | 1258.1199   | 6.3006      | 0.0157   |                 |
| <b>AD</b>                   | 1                 | 8752.8226   | 43.8337     | < 0.0001 |                 |
| <b>BC</b>                   | 1                 | 8418.1061   | 42.1574     | < 0.0001 |                 |
| <b>BD</b>                   | 1                 | 29579.9902  | 148.1351    | < 0.0001 |                 |
| <b>CE</b>                   | 1                 | 734.6371    | 3.6790      | 0.0613   |                 |
| <b>A<sup>2</sup></b>        | 1                 | 2911.6108   | 14.5812     | 0.0004   |                 |
| <b>B<sup>2</sup></b>        | 1                 | 15329.8818  | 76.7713     | < 0.0001 |                 |
| <b>E<sup>2</sup></b>        | 1                 | 9221.4000   | 46.1803     | < 0.0001 |                 |
| <b>ABD</b>                  | 1                 | 6479.9444   | 32.4512     | < 0.0001 |                 |
| <b>Residual</b>             | 46                | 199.6824    |             |          |                 |
| <b>Lack of Fit</b>          | 7                 | 352.3020    | 2.044830163 | 0.0736   | not significant |
| <b>Pure Error</b>           | 39                | 172.2891    |             |          |                 |
| <b>Cor Total</b>            | 81                |             |             |          |                 |

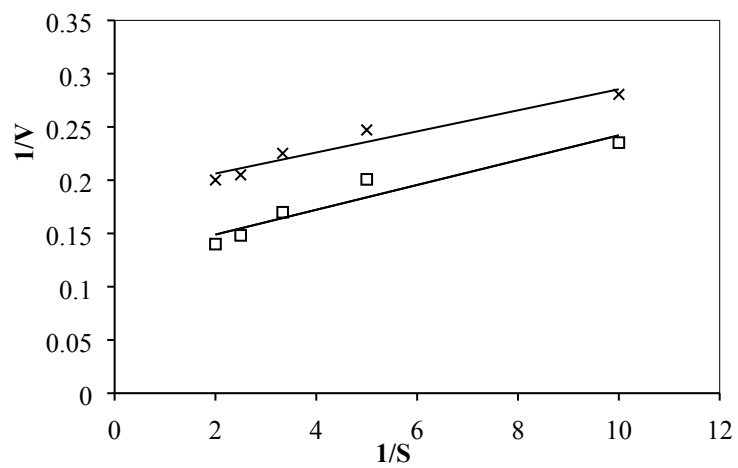

Fig. 1-S Lineweaver-Burk plot for the immobilized (■) and free (□)  $\alpha$ -amylase
